# Supplementary material for: Highly efficient synthesis of lysergic acid using engineered budding yeast
Source: Royal Society of Chemistry journal article supplement (doi:10.1039/d4gc03756a), 2024-01-01
Supplement: d4gc03756a1.pdf [file d4gc03756a1.pdf]

# Highly efficient synthesis of lysergic acid by engineered budding yeast

Nan Wu<sup>a,c</sup>, Mingdong Yao<sup>a,c</sup>, Wenhai Xiao<sup>b,c</sup>, Ying Wang<sup>a,c\*</sup>, Ying-jin Yuan<sup>a,c</sup>

<sup>a</sup>Frontiers Science Center for Synthetic Biology and Key Laboratory of Systems Bioengineering (Ministry of Education), School of Chemical Engineering and Technology, Tianjin University, Tianjin 300072, China

<sup>b</sup>School of Life Science, Faculty of Medicine, Tianjin University, Tianjin, China

<sup>c</sup>Frontier Research Institute for Synthetic Biology, Tianjin University

\*Corresponding author: *E-mail address*: ying.wang@tju.edu.cn

**Contains:**

|            |                                                                                                                            |
|------------|----------------------------------------------------------------------------------------------------------------------------|
| Table S1:  | Plasmids used in this study.                                                                                               |
| Table S2:  | Strains constructed in this study.                                                                                         |
| Table S3:  | Primers used in this study.                                                                                                |
| Table S4:  | gRNA target sequences used in this study.                                                                                  |
| Table S5:  | <sup>1</sup> H NMR data of compounds lysergic acid (LA).                                                                   |
| Figure S1: | <sup>1</sup> H NMR spectrum of LA in D <sub>2</sub> O (500 MHz).                                                           |
| Figure S2: | MS spectra of sample LA and standard LA.                                                                                   |
| Figure S3: | Comparative analysis results of different sequences alignment of cloA from <i>Claviceps purpurea</i> source.               |
| Figure S4: | The results of fermentation mass spectrometry of suspected LA were consistent with those of reported LA mass spectrometry. |
| Figure S5: | The results of growth and LA production in control strain (Sc251) and $\Delta$ sch9 strain (Sc560).                        |
| Figure S6: | The effect of $\Delta$ sch9 on LA production.                                                                              |
| Figure S7: | Results of CpCPR transmembrane domain analysis.                                                                            |

**Table S1** Plasmids used in this study.

| Plasmids | Description                                                                                                                         | Source     |
|----------|-------------------------------------------------------------------------------------------------------------------------------------|------------|
| pWN416   | The cassette $T_{FBAI}$ - $P_{GALL.10}$ - $T_{TDH2}$ was cloned and inserted into pRS416.                                           | This study |
| pWN041   | The fragment <i>HSP12</i> (BsaI) was inserted into pWN416 with standardized restriction sites.                                      | This study |
| pWN042   | The fragment <i>OLE1</i> (BsaI) was inserted into pWN416 with standardized restriction sites.                                       | This study |
| pWN043   | The fragment <i>SNF1</i> (BsaI) was inserted into pWN416 with standardized restriction sites.                                       | This study |
| pWN044   | The fragment <i>TIP1</i> (BsaI) was inserted into pWN416 with standardized restriction sites.                                       | This study |
| pWN045   | The fragment <i>MPP10</i> (BsaI) was inserted into pWN416 with standardized restriction sites.                                      | This study |
| pWN046   | The fragment <i>CpCloA(1)</i> (BsaI), <i>CpCPR</i> (BsmBI) were inserted into pWN416 with standardized restriction sites.           | This study |
| pWN047   | The fragment <i>CpCloA(1)_HDEL</i> (BsaI), <i>CpCPR_HDEL</i> (BsmBI) were inserted into pWN416 with standardized restriction sites. | This study |
| pWN048   | The fragment <i>CpCloA(1)_KKYL</i> (BsaI), <i>CpCPR_KKYL</i> (BsmBI) were inserted into pWN416 with standardized restriction sites. | This study |
| pWN049   | The fragment <i>easC</i> (BsaI) was inserted into pWN416 with standardized restriction sites.                                       | This study |
| pWN050   | The fragment <i>easC(SKL)</i> (BsaI) was inserted into pWN416 with standardized restriction sites.                                  | This study |
| pWN051   | The fragment <i>fzo1</i> (BsaI) was inserted into pWN416 with standardized restriction sites.                                       | This study |
| pWN052   | The fragment <i>pex34</i> (BsaI) was inserted into pWN416 with standardized restriction sites.                                      | This study |
| pWN053   | The fragment <i>easC(SKL)</i> (BsaI), <i>pex34</i> (BsmBI) were inserted into pWN416 with standardized restriction sites.           | This study |
| pWN054   | The fragment <i>CpCPR</i> (BsaI) was inserted into pWN416 with standardized restriction sites.                                      | This study |
| pWN055   | The fragment <i>t26CpCPR</i> (BsaI) was inserted into pWN416 with standardized restriction sites.                                   | This study |
| pWN056   | The fragment <i>t31CpCPR</i> (BsaI) was inserted into pWN416 with standardized restriction sites.                                   | This study |
| pWN057   | The fragment <i>t36CpCPR</i> (BsaI) was inserted into pWN416 with standardized restriction sites.                                   | This study |
| pWN058   | The fragment <i>CpCloA(1)</i> (BsaI), <i>t36CpCPR</i> (BsmBI) were inserted into pWN416 with standardized restriction sites.        | This study |
| pWN059   | The fragment <i>CpCloA(1)-L1-t36CpCPR</i> (BsaI) was inserted into pWN416 with standardized restriction sites.                      | This study |
| pWN060   | The fragment <i>CpCloA(1)-L2-t36CpCPR</i> (BsaI) was inserted into pWN416 with standardized restriction sites.                      | This study |
| pWN061   | The fragment <i>CpCloA(1)-L3-t36CpCPR</i> (BsaI) was inserted into pWN416 with standardized restriction sites.                      | This study |
| pWN062   | The fragment <i>CpCloA(1)-L2-t36CpCPR_KKYL</i> (BsaI) was inserted into pWN416 with standardized restriction sites.                 | This study |

**Table S2** Strains constructed in this study.

| Strains         | Description                                                                                                                                                                                                                                                                                                                                                               | Source     |
|-----------------|---------------------------------------------------------------------------------------------------------------------------------------------------------------------------------------------------------------------------------------------------------------------------------------------------------------------------------------------------------------------------|------------|
| SyBE_Sc06130096 | $\Delta GAL80::P_{GAL1,10}-IDII-His, ERG20p_{ERG20}::HXT1p_{ERG20}, \Delta 22::LUE2-T_{CYC1-dmaW}-P_{GAL1,10}-easF-T_{ADH1}, \Delta 15::KanR-T_{CYC1}-easE-P_{GAL1,10}-easC-T_{ADH2}, \Delta 14::hphMX6-T_{ADH2}-fadI-P_{GAL1,10}-eroI-T_{CYC1}, \Delta GAL1\backslash 7\backslash 10::P_{GAL7}-easD_{Cp}-T_{GPM1}, ho::T_{TDH2}-easG_{Cp}-P_{gal110}-easA_{Cf}-T_{FBA1}$ | 1          |
| SyBE_Sc06130244 | SyBE_Sc06130096, <i>YMRW</i> $\Delta 15:: Trp-T_{CYC1}-Cp_{cloA(1)}-P_{Gal110}-Cp_{CPR}-T_{ADH1}$                                                                                                                                                                                                                                                                         | This study |
| SyBE_Sc06130245 | SyBE_Sc06130096, <i>YMRW</i> $\Delta 15:: Trp-T_{CYC1}-Cp_{cloA(2)}-P_{Gal110}-Cp_{CPR}-T_{ADH1}$                                                                                                                                                                                                                                                                         | This study |
| SyBE_Sc06130246 | SyBE_Sc06130096, <i>YMRW</i> $\Delta 15:: Trp-T_{CYC1}-Cp_{cloA(3)}-P_{Gal110}-Cp_{CPR}-T_{ADH1}$                                                                                                                                                                                                                                                                         | This study |
| SyBE_Sc06130251 | SyBE_Sc06130244 with pWN416                                                                                                                                                                                                                                                                                                                                               | This study |
| SyBE_Sc06130295 | SyBE_Sc06130244 with pWN041                                                                                                                                                                                                                                                                                                                                               | This study |
| SyBE_Sc06130296 | SyBE_Sc06130244 with pWN042                                                                                                                                                                                                                                                                                                                                               | This study |
| SyBE_Sc06130297 | SyBE_Sc06130244 with pWN043                                                                                                                                                                                                                                                                                                                                               | This study |
| SyBE_Sc06130298 | SyBE_Sc06130244 with pWN044                                                                                                                                                                                                                                                                                                                                               | This study |
| SyBE_Sc06130302 | SyBE_Sc06130244 with pWN045                                                                                                                                                                                                                                                                                                                                               | This study |
| SyBE_Sc06130560 | SyBE_Sc06130244, $\Delta sch9$                                                                                                                                                                                                                                                                                                                                            | This study |
| SyBE_Sc06130561 | SyBE_Sc06130244 with pWN046                                                                                                                                                                                                                                                                                                                                               | This study |
| SyBE_Sc06130562 | SyBE_Sc06130244 with pWN047                                                                                                                                                                                                                                                                                                                                               | This study |
| SyBE_Sc06130563 | SyBE_Sc06130244 with pWN048                                                                                                                                                                                                                                                                                                                                               | This study |
| SyBE_Sc06130564 | SyBE_Sc06130560 with pWN046                                                                                                                                                                                                                                                                                                                                               | This study |
| SyBE_Sc06130565 | SyBE_Sc06130560 with pWN047                                                                                                                                                                                                                                                                                                                                               | This study |
| SyBE_Sc06130566 | SyBE_Sc06130560 with pWN048                                                                                                                                                                                                                                                                                                                                               | This study |
| SyBE_Sc06130567 | SyBE_Sc06130560 with pWN416                                                                                                                                                                                                                                                                                                                                               | This study |
| SyBE_Sc06130568 | SyBE_Sc06130244 with pWN049                                                                                                                                                                                                                                                                                                                                               | This study |
| SyBE_Sc06130569 | SyBE_Sc06130244 with pWN050                                                                                                                                                                                                                                                                                                                                               | This study |
| SyBE_Sc06130570 | SyBE_Sc06130560 with pWN049                                                                                                                                                                                                                                                                                                                                               | This study |
| SyBE_Sc06130571 | SyBE_Sc06130560 with pWN050                                                                                                                                                                                                                                                                                                                                               | This study |
| SyBE_Sc06130580 | SyBE_Sc06130244 with pWN051                                                                                                                                                                                                                                                                                                                                               | This study |
| SyBE_Sc06130581 | SyBE_Sc06130244 with pWN052                                                                                                                                                                                                                                                                                                                                               | This study |
| SyBE_Sc06130582 | SyBE_Sc06130560 with pWN051                                                                                                                                                                                                                                                                                                                                               | This study |
| SyBE_Sc06130583 | SyBE_Sc06130560 with pWN052                                                                                                                                                                                                                                                                                                                                               | This study |
| SyBE_Sc06130584 | SyBE_Sc06130244 with pWN053                                                                                                                                                                                                                                                                                                                                               | This study |
| SyBE_Sc06130585 | SyBE_Sc06130560 with pWN053                                                                                                                                                                                                                                                                                                                                               | This study |
| SyBE_Sc06130287 | SyBE_Sc06130244 with pWN054                                                                                                                                                                                                                                                                                                                                               | This study |
| SyBE_Sc06130288 | SyBE_Sc06130244 with pWN055                                                                                                                                                                                                                                                                                                                                               | This study |
| SyBE_Sc06130289 | SyBE_Sc06130244 with pWN056                                                                                                                                                                                                                                                                                                                                               | This study |
| SyBE_Sc06130290 | SyBE_Sc06130244 with pWN057                                                                                                                                                                                                                                                                                                                                               | This study |
| SyBE_Sc06130400 | SyBE_Sc06130244 with pWN058                                                                                                                                                                                                                                                                                                                                               | This study |
| SyBE_Sc06130401 | SyBE_Sc06130244 with pWN059                                                                                                                                                                                                                                                                                                                                               | This study |
| SyBE_Sc06130402 | SyBE_Sc06130244 with pWN060                                                                                                                                                                                                                                                                                                                                               | This study |
| SyBE_Sc06130403 | SyBE_Sc06130244 with pWN061                                                                                                                                                                                                                                                                                                                                               | This study |
| SyBE_Sc06130404 | SyBE_Sc06130560 with pWN058                                                                                                                                                                                                                                                                                                                                               | This study |

|                 |                                                                                                      |            |
|-----------------|------------------------------------------------------------------------------------------------------|------------|
| SyBE_Sc06130405 | SyBE_Sc06130560 with pWN059                                                                          | This study |
| SyBE_Sc06130406 | SyBE_Sc06130560 with pWN060                                                                          | This study |
| SyBE_Sc06130407 | SyBE_Sc06130560 with pWN061                                                                          | This study |
| SyBE_Sc06130593 | SyBE_Sc06130560 with pWN416                                                                          | This study |
| SyBE_Sc06130576 | SyBE_Sc06130560, <i>YPRCΔτ3::P<sub>gal1</sub>-CpcoA(1)-L2-t36CpCPR</i> -<br><i>T<sub>FBA1</sub></i>  | This study |
| SyBE_Sc06130577 | SyBE_Sc06130576 with pWN416                                                                          | This study |
| SyBE_Sc06130578 | SyBE_Sc06130576, <i>Δint11::T<sub>TDH2</sub>-easC(SKL)-P<sub>gal110</sub>-pex34-T<sub>FBA1</sub></i> | This study |
| SyBE_Sc06130590 | SyBE_Sc06130578 with pWN416                                                                          | This study |
| SyBE_Sc06130591 | SyBE_Sc06130578 with pWN060                                                                          | This study |
| SyBE_Sc06130592 | SyBE_Sc06130578 with pWN062                                                                          | This study |

**Table S3** Primers used in this study.

| <b>Primers</b>                           | <b>Sequence (5'-3')</b>                                                           |
|------------------------------------------|-----------------------------------------------------------------------------------|
| <b>For cloning <i>cloA(1)</i></b>        |                                                                                   |
| W-1F                                     | gtcaaggagaaaaactataATGTCTTTGCAATGGTTACAACAAACTAG                                  |
| W-2R                                     | agtaacttaaggagttaaatTTAAGTCCATCTATCAGCCAAGATTTGTAATTC                             |
| <b>For cloning <i>cloA(2)</i></b>        |                                                                                   |
| W-3F                                     | gtcaaggagaaaaactataATGGCTGTTTCATGTTGTTAAATCTTACTC                                 |
| W-4R                                     | agtaacttaaggagttaaatTTAGACATTACCAGATTTATACATTGATCTAGAACC                          |
| <b>For cloning <i>cloA(3)</i></b>        |                                                                                   |
| W-5F                                     | gtcaaggagaaaaactataATGAAGTTGCATGTTGTTCAATCTTACC                                   |
| W-6R                                     | agtaacttaaggagttaaatTTATTCTTCGATTAACATCTTTTACCTTTTGGAG                            |
| <b>For cloning <i>CpCPR</i></b>          |                                                                                   |
| W-7F                                     | aaaaagtaagaatTTTgaaaattcaataaaATGGCAGAATTGGATACCTTGGATATG                         |
| W-8R                                     | aaaaactatatcaattaattgaattaacTTAGGACCAAACATCTTCTTGGTATTGGTTAG                      |
| <b>For cloning <i>Hsp12</i></b>          |                                                                                   |
| W-9F                                     | gtcaaggagaaaaactataATGTCTGACGCAGGTAGAAAAGGATTC                                    |
| W-10R                                    | agtaacttaaggagttaaatTTACTTCTTGGTTGGGTCTTCTTCACC                                   |
| <b>For cloning <i>W-11Fning OLE1</i></b> |                                                                                   |
| W-11F                                    | gtcaaggagaaaaactataATGCCAATTCTGGAACACTATTGAATTG                                   |
| W-12R                                    | agtaacttaaggagttaaatTTAAAAGAACTTACCAGTTTCGTAGATTTACCTC                            |
| <b>For cloning <i>SNF1</i></b>           |                                                                                   |
| W-13F                                    | gtcaaggagaaaaactataATGAGCAGTAACAACAACACAAACACAG                                   |
| W-14R                                    | agtaacttaaggagttaaatTCAATTGCTTTGACTGTTAACGGCTAATTCC                               |
| <b>For cloning <i>TIP1</i></b>           |                                                                                   |
| W-15F                                    | gtcaaggagaaaaactataATGTCCGTTTCCAAGATTGCTTTTCG                                     |
| W-16R                                    | agtaacttaaggagttaaatTTATAACAATAAAGCAGCTGCACCTGC                                   |
| <b>For cloning <i>MPP10</i></b>          |                                                                                   |
| W-17F                                    | gtcaaggagaaaaactataATGTCAGAACTCTTTGGAGTATTGAAATCTAATG                             |
| W-18R                                    | agtaacttaaggagttaaatTCAAAGTTTATATTTGTGCTATCTGGCCC                                 |
| <b>For cloning <i>cloA(1)_HDEL</i></b>   |                                                                                   |
| W-19F                                    | gtcaaggagaaaaactataATGTCTTTGCAATGGTTACAACAAACTAG                                  |
| W-20R                                    | agtaacttaaggagttaaatTTACAATTCGTCTGTGAACCACCACCAGTCCATCTATCAGCC<br>AAGATTTGTAATTC  |
| <b>For cloning <i>CpCPR_HDEL</i></b>     |                                                                                   |
| W-21F                                    | aaaaagtaagaatTTTgaaaattcaataaaATGGCAGAATTGGATACCTTGGATATG                         |
| W-22R                                    | atcaattaattgaattaacTTACAATTCGTCTGTGAACCACCACCGGACCAAACATCTTCT<br>TGGTATTGGTTAG    |
| <b>For cloning <i>cloA(1)_KKYL</i></b>   |                                                                                   |
| W-23F                                    | gtcaaggagaaaaactataATGTCTTTGCAATGGTTACAACAAACTAG                                  |
| W-24R                                    | agtaacttaaggagttaaatTTACAAGTACTTCTTTGAACCACCACCAGTCCATCTATCAGCC<br>AAGATTTGTAATTC |
| <b>For cloning <i>CpCPR_KKYL</i></b>     |                                                                                   |
| W-25F                                    | aaaaagtaagaatTTTgaaaattcaataaaATGGCAGAATTGGATACCTTGGATATG                         |
| W-26R                                    | atcaattaattgaattaacTTACAAGTACTTCTTTGAACCACCACCGGACCAAACATCTTCTT<br>GGTATTGGTTAG   |
| <b>For cloning <i>easC</i></b>           |                                                                                   |
| W-27F                                    | AGTTGAATATTCCTCAAAAATGGCACCAGACTCCAAACCAAC                                        |
| W-28R                                    | aatcattcattctcagacTTACAATCTAGCTGGAATAAAAGATTCTTCAGC                               |
| <b>For cloning <i>easC(SKL)</i></b>      |                                                                                   |
| W-29F                                    | gtcaaggagaaaaactataATGGCTCCAGATTCTAAGCCAACCTAC                                    |
| W-30R                                    | agtaacttaaggagttaaatTTATAGTTTAGATGGAATAAAAGATTCTTCTGCTGGAGCTTC                    |

|                                                    |                                                                             |
|----------------------------------------------------|-----------------------------------------------------------------------------|
| <b>For cloning <i>Fzo1</i></b>                     |                                                                             |
| W-31F                                              | gtcaaggagaaaaactataATGTCTGAAGGAAAACAACAATTCAAAGACAG                         |
| W-32R                                              | agtaacttaaggagtaaataCTAATCGATGTCTAAATTTATTCTCCACCATCAATTTTG                 |
| <b>For cloning <i>Pex34</i></b>                    |                                                                             |
| W-33F                                              | gtcaaggagaaaaactataATGGTTTCGAAGAAAATACGGCTGAAATC                            |
| W-34R                                              | agtaacttaaggagtaaataTTATACAATTATTCTACAAAGTGTTATTATGTTAGATAATCTTT            |
| <b>For cloning <i>t26CpCPR</i></b>                 |                                                                             |
| W-35F                                              | gtcaaggagaaaaactataATGACTATTTGGGGTGTGTTAAGGACCC                             |
| W-36R                                              | agtaacttaaggagtaaataTTAGGACCAAACATCTTCTTGGTATTGGTTAGC                       |
| <b>For cloning <i>t31CpCPR</i></b>                 |                                                                             |
| W-37F                                              | gtcaaggagaaaaactataATGGTTAAGGACCCTTACGCTAATACCTTCG                          |
| W-38R                                              | agtaacttaaggagtaaataTTAGGACCAAACATCTTCTTGGTATTGGTTAGC                       |
| <b>For cloning <i>t36CpCPR</i></b>                 |                                                                             |
| W-39F                                              | gtcaaggagaaaaactataATGGCTAATACCTTCGCTAACGTTAACGG                            |
| W-40R                                              | agtaacttaaggagtaaataTTAGGACCAAACATCTTCTTGGTATTGGTTAGC                       |
| <b>For cloning <i>cloA(1)-L1-t36CpCPR</i></b>      |                                                                             |
| W-41F                                              | gtcaaggagaaaaactataATGTCTTTGCAATGGTTACAACAACTAGAC                           |
| W-42R                                              | CTTAGCAGCAGCTTCCTTAGCAGCAGCTTCAGTCCATCTATCAGCCAAGATTTGTA<br>ATTC            |
| W-43F                                              | CTAAGGAAGCTGCTGCTAAGATGGCTAATACCTTCGCTAACGTTAAC                             |
| W-44R                                              | agtaacttaaggagtaaataTTAGGACCAAACATCTTCTTGGTATTGGTTAG                        |
| <b>For cloning <i>cloA(1)-L2-t36CpCPR</i></b>      |                                                                             |
| W-45F                                              | gtcaaggagaaaaactataATGTCTTTGCAATGGTTACAACAACTAGAC                           |
| W-46R                                              | TGGAGTTGGAGTTGGAGTTGGAGTTGGAGTCCATCTATCAGCCAAGATTTGTAATT<br>C               |
| W-47F                                              | CAACTCCAACTCCAACTCCAATGGCTAATACCTTCGCTAACGTTAAC                             |
| W-48R                                              | agtaacttaaggagtaaataTTAGGACCAAACATCTTCTTGGTATTGGTTAG                        |
| <b>For cloning <i>cloA(1)-L3-t36CpCPR</i></b>      |                                                                             |
| W-49F                                              | gtcaaggagaaaaactataATGTCTTTGCAATGGTTACAACAACTAGAC                           |
| W-50R                                              | AGAACCACCACCAGTCCATCTATCAGCCAAGATTTGTAATTC                                  |
| W-51F                                              | GGACTGGTGGTGGTGGTTCTATGGCTAATACCTTCGCTAACGTTAAC                             |
| W-52R                                              | agtaacttaaggagtaaataTTAGGACCAAACATCTTCTTGGTATTGGTTAG                        |
| <b>For cloning <i>cloA(1)-L2-t36CpCPR_KKYL</i></b> |                                                                             |
| W-53F                                              | gtcaaggagaaaaactataATGTCTTTGCAATGGTTACAACAACTAGAC                           |
| W-54R                                              | agtaacttaaggagtaaataTTACAAGTACTTCTTTGAACCACCACCGACCAAACATCTTC<br>TTGGTATTGG |

# Sequences underlined and highlighted in bold locate signal peptides for ER and Peroxisomes

**Table S4** gRNA target sequences used in this study.

| Target                        | Sequence (5'-3')     |
|-------------------------------|----------------------|
| <i>G418</i>                   | AGGCAGTTCATAGGATGGC  |
| <i>YPRC<math>\tau</math>3</i> | tattccatggcctcttagtt |
| <i>Int11</i>                  | gaacaagaacaacaaactcc |
| <i>Sch9</i>                   | TTGGTCACTGATTATATGAG |
| <i>Ras2</i>                   | AGGAAGCAGCAAGCTGCACC |
| <i>PEX5</i>                   | GCTCAACAACCGCATCAAGC |
| <i>NCP1</i>                   | cgtccatgtcacctccattg |



**Table S5**  $^1\text{H}$  NMR data of compounds lysergic acid (LA).

| Proton serial number | $^1\text{H}$ NMR ( $\delta$ , ppm) |
|----------------------|------------------------------------|
| 14                   | 7.87 (1H, br s)                    |
| 12                   | 7.68 (1H, d, $j=8.24$ )            |
| 13                   | 7.49 (1H, t, $j=7.69$ )            |
| 2                    | 7.36 (1H, s)                       |
| 9                    | 7.22 (1H, br s)                    |
| 8                    | 4.39 (1H, ov)                      |
| 5                    | 4.39 (1H, ov)                      |
| 7                    | 3.42-3.89 (2H, ov)                 |
| 18                   | 3.32 (3H, ov)                      |
| 4                    | 3.17-3.25 (2H, ov)                 |

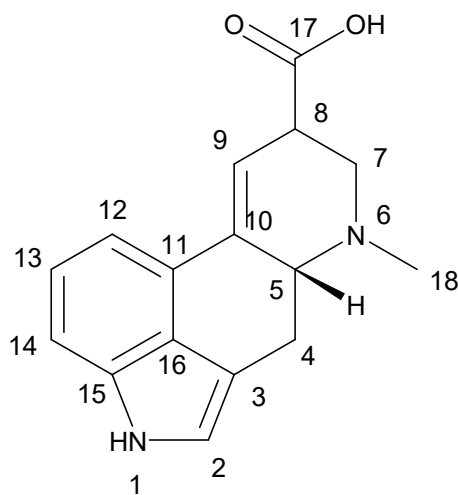

Numbered LA chemical structure

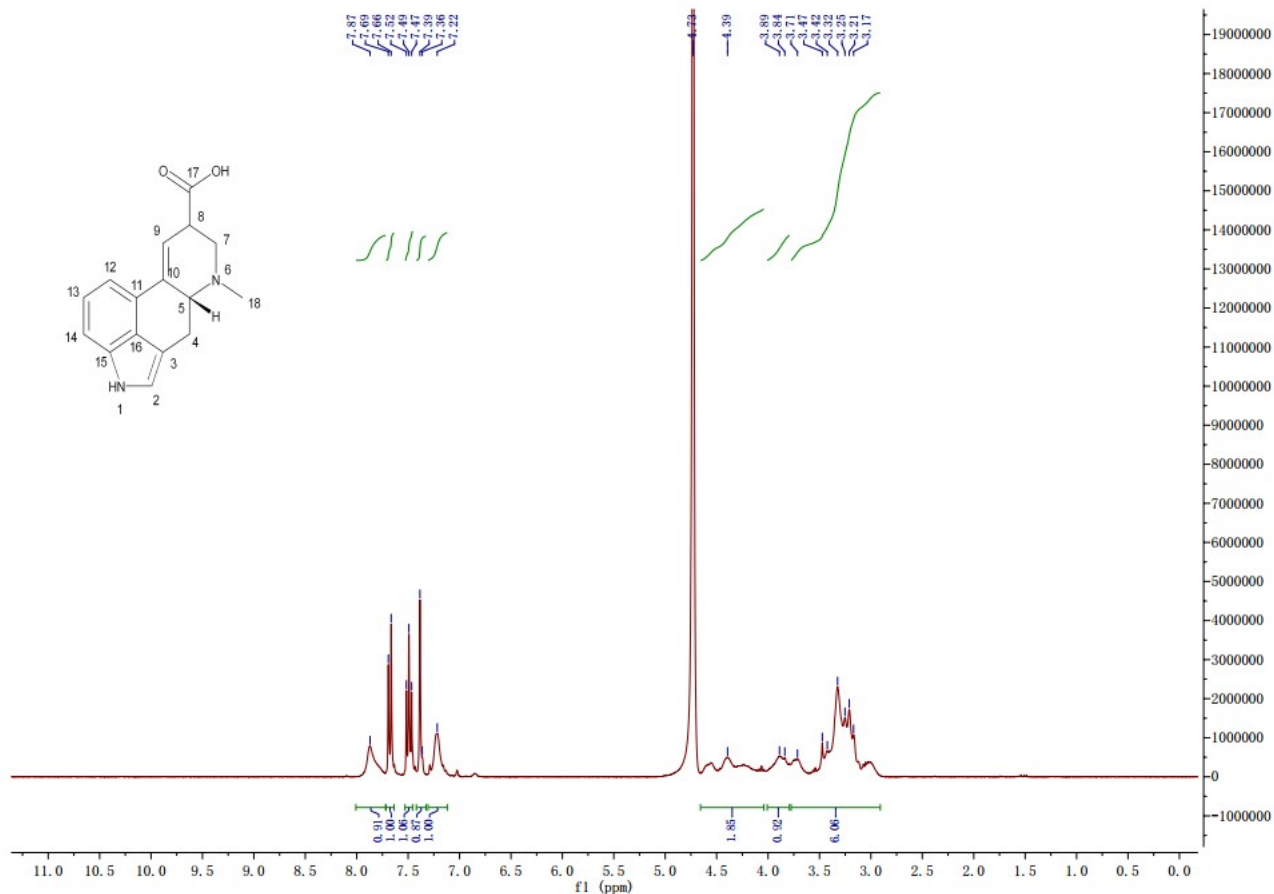

Figure S1 <sup>1</sup>H NMR spectrum of LA in D<sub>2</sub>O (500 MHz).

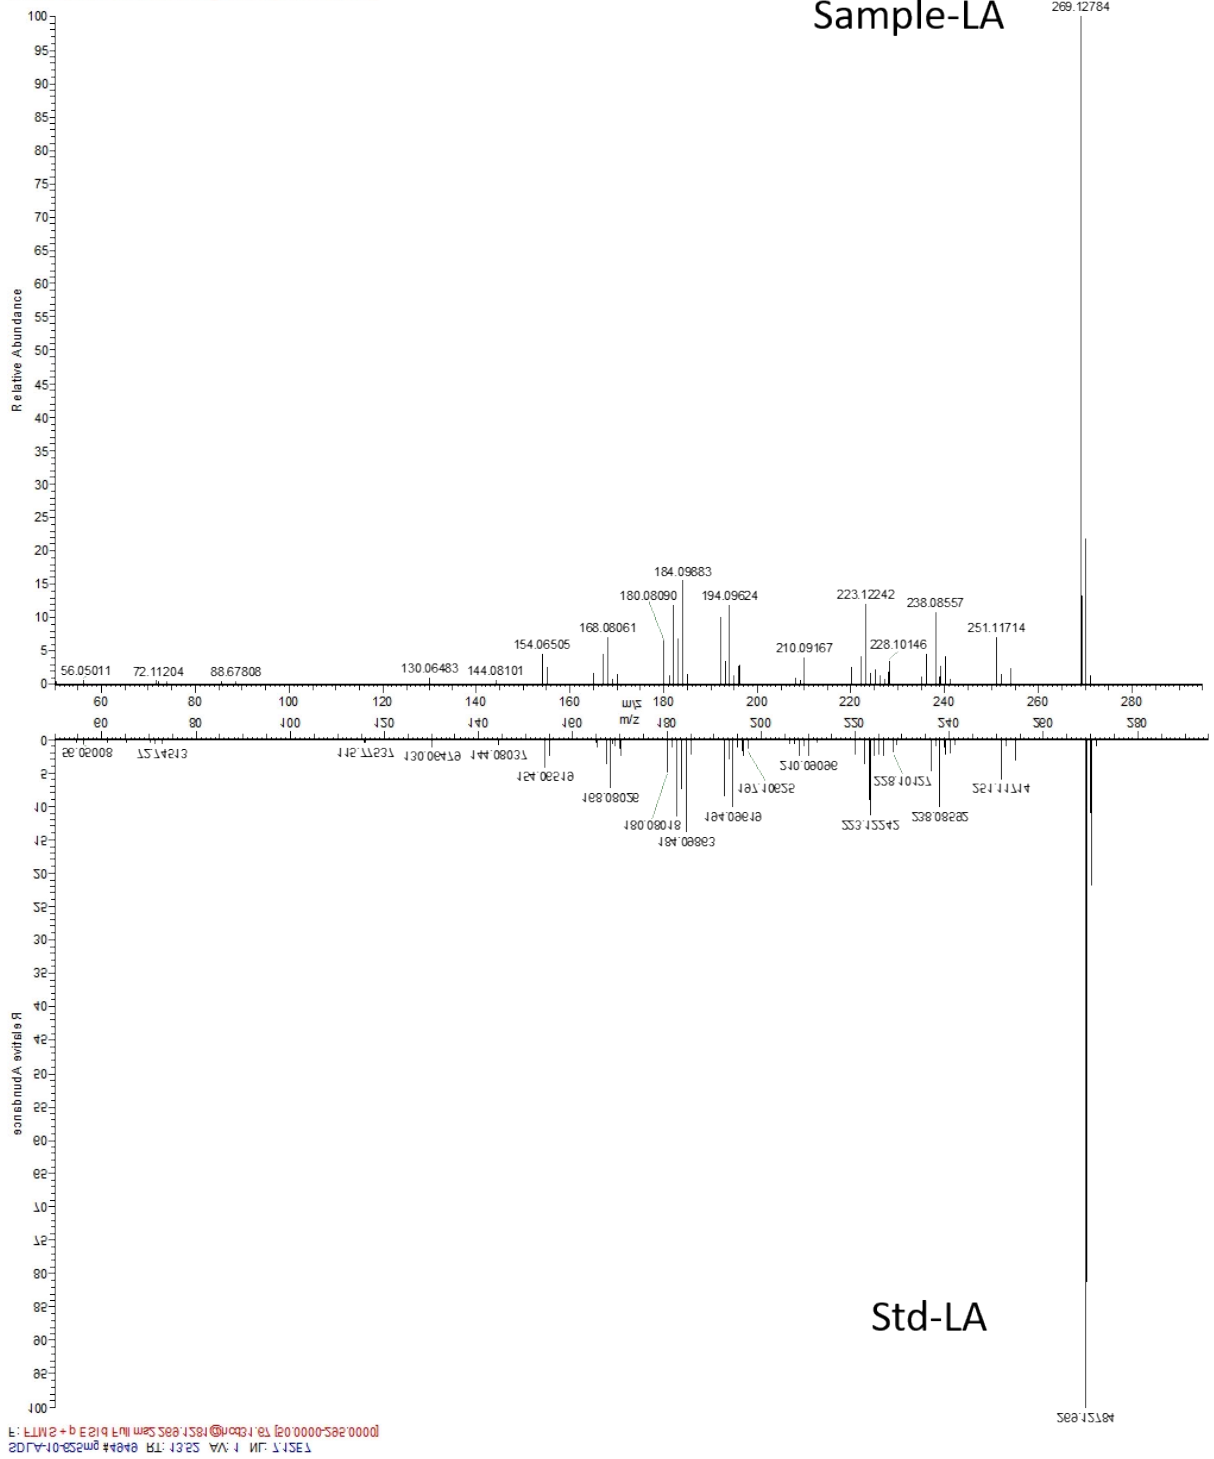

Figure S2 MS spectra of sample LA and standard LA.

|           |                                                                                |     |
|-----------|--------------------------------------------------------------------------------|-----|
| cloA-1    | MSLQWLQQTRHEL <del>SWTWLILTTTCIA</del> ISPLVLKGIYNYVF                          | 40  |
| cloA-2    | .....MAVHVVKSYSQLAGLTVVA..LFYFIFLVLS                                           | 30  |
| cloA-3    | .....MKLHVVCSPCLAGVAVV..HIFGSLEAYV                                             | 30  |
| Consensus | 1      1                                                                       |     |
| cloA-1    | HPLRNIPGPKLAALTD <del>FYAFYWNWIRDE</del> GYSKQFSRLHEQ                          | 80  |
| cloA-2    | RPTSKLPGFWYSKWTDL.VERYQWFYGK..QTFYTHDLHK                                       | 67  |
| cloA-3    | QGAWEMVFRMDRRYVPK.TCRAKVSKE..DVWLLIDVAH                                        | 67  |
| Consensus |                                                                                |     |
| cloA-1    | YNSPIIRIGENN <del>WHTTQVEFYDVI</del> FKSGSKWIKDRSFYKY                          | 120 |
| cloA-2    | KYGPVIRVAENQAVADLET <del>VKSVYTIKET</del> YRKT.FYEL                            | 106 |
| cloA-3    | .IGP <del>VIRVAEDKVI</del> VADLD <del>AVKSIYTIKET</del> YRKT.D.FYKL            | 105 |
| Consensus | pi r p v                  k fy                                                 |     |
| cloA-1    | FNG.....LDAMIEFYQYRTY <del>RTHL</del> PLYAQRAIDGLAEK                           | 155 |
| cloA-2    | LVS <del>RPIQTVFSTADVEL</del> FRKLRRLMASQMSSESSLKSMLEPQ                        | 146 |
| cloA-3    | ITS <del>RPIQTI</del> FSTGDV <del>DLFRKLR</del> RELLASQMSSESSLKTMMEQ           | 145 |
| Consensus | r r a          p                                                               |     |
| cloA-1    | LRSDLTNSASGMMRQT <del>RNGQTVNMA</del> RVLRITLSTSMILHNL                         | 195 |
| cloA-2    | VTSHVELAIQRMK <del>EEKDRGVIDVFR</del> WCLFMTT <del>DV</del> IGELS              | 186 |
| cloA-3    | IKSHVDLAIQRMK <del>EEKARGVIDVFR</del> WLSL <del>FMTT</del> DIIGELS             | 185 |
| Consensus | s          m          k          k          t i                                |     |
| cloA-1    | <del>ESLDISLNDGDEYHFFL</del> DAFQ <del>LMTQ</del> SWL <del>FV</del> TYEMVPMVL  | 235 |
| cloA-2    | <del>EGESFQMLEKGGKKTQY</del> EDL <del>EN</del> VSSV <del>SADRIT</del> FFLFFHLA | 226 |
| cloA-3    | <del>EGESFQMLEKGGKNQY</del> EDL <del>DISSIAAYRV</del> IFFFFWLA                 | 225 |
| Consensus | f                  e e                  t p                                    |     |
| cloA-1    | SLIPGTSFARFNSS <del>YTTFSNYCTAWN</del> DEDMRKCRESEEQS                          | 275 |
| cloA-2    | DKYD..KILPLFRSKIA <del>INRRIVEYSR</del> QSLGRYQKCVESD                          | 264 |
| cloA-3    | DRYS..NILPLFKGIS <del>ITRRLKEYSR</del> QSIGRYQK <del>QV</del> EN               | 263 |
| Consensus | e                                                                              |     |
| cloA-1    | TRDSHTKRYLSLKDD <del>DARKKTAI</del> PYEDD <del>VFN</del> FVAGGSDT              | 315 |
| cloA-2    | ATSAKYTFVEKLFQAE <del>KDKITFED</del> ITNAQTFIIAGSDT                            | 304 |
| cloA-3    | PANAKQTFVAKMFQAE <del>KDKIAFGD</del> ITNAQTLIVAGSDT                            | 303 |
| Consensus | k          l          gsdt                                                     |     |
| cloA-1    | TAYITACAFYHILSS <del>ETVREN</del> VVELDEHSSIRDEEDYN                            | 355 |
| cloA-2    | TATILTYLIWSICKR <del>PELRDALL</del> KELR <del>TL</del> P...GFTEP               | 340 |
| cloA-3    | TASILTYLIWSVCKR <del>EDLRDALL</del> KELR <del>TL</del> P...GFTEA               | 339 |
| Consensus | st a t                  p r l e l                  f                           |     |
| cloA-1    | KIQNLHYLN <del>AVIRETLRIS</del> V <del>PV</del> EGSLPRIVEGGITIGSF              | 395 |
| cloA-2    | DLRLELELN <del>CTV</del> BETLRVYSS <del>PEASL</del> PRAVEKGGAHVCGY             | 380 |
| cloA-3    | DLRLELELN <del>RTI</del> BETLRVYSS <del>VEALL</del> PRAVEKGGAHIGGY             | 379 |
| Consensus | lp n          eclr          p lpr vp gg          g                             |     |
| cloA-1    | SLPAGTGV <del>SITQQAISFNEK</del> IFLPHSFL <del>ER</del> WIC <del>E</del> KSVG  | 435 |
| cloA-2    | YLSEGT <del>TVAACAYTMHR</del> DP <del>AI</del> ENED <del>VE</del> FCRWANE.TRA  | 419 |
| cloA-3    | YLSEGT <del>TVAACAYTMHR</del> DP <del>AI</del> ENED <del>VE</del> FCRWVNE.TKA  | 418 |
| Consensus | l gt v                  if p f p rw p                                          |     |
| cloA-1    | LDKWNIAFSRGR <del>QCIGITL</del> AYLELR <del>CVIA</del> YFFSRFD.MA              | 474 |
| cloA-2    | MKEAFM <del>FCRGR</del> SRSMYKSGNV.....                                        | 440 |
| cloA-3    | MKEASM <del>FCRGR</del> VCIGIHLAYIELRLAAAR <del>FL</del> LEFPNAR               | 458 |
| Consensus | f rg r                                                                         |     |
| cloA-1    | LTGNCGDQLRWV <del>DRFVAVN</del> LDDELQILADRW                                   | 506 |
| cloA-2    | .....                                                                          | 440 |
| cloA-3    | VSAKEGMSDR <del>DM</del> STVYFLMSPKGRCLIEE.                                    | 489 |
| Consensus |                                                                                |     |

**Figure S3** Comparative analysis results of different sequences alignment of *cloA* from *Claviceps purpurea* source.

**A**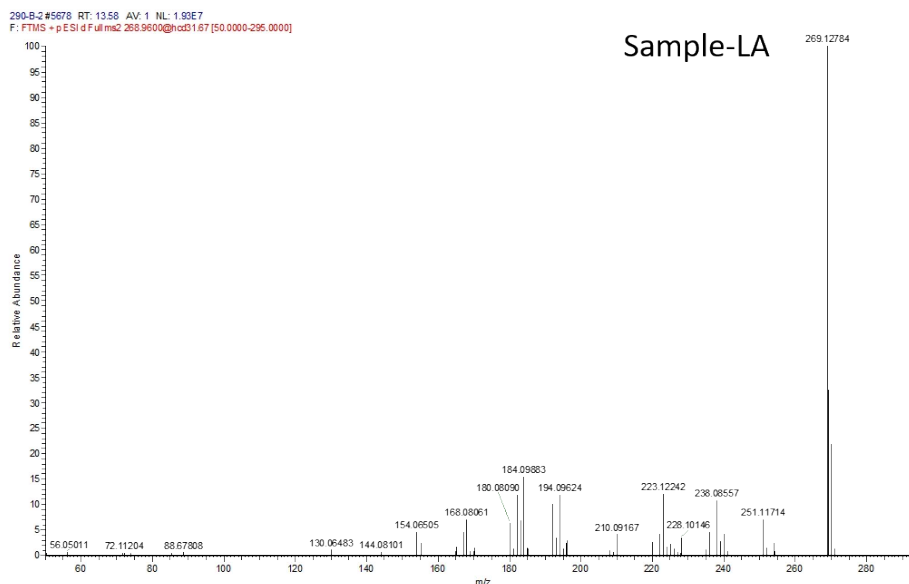**B**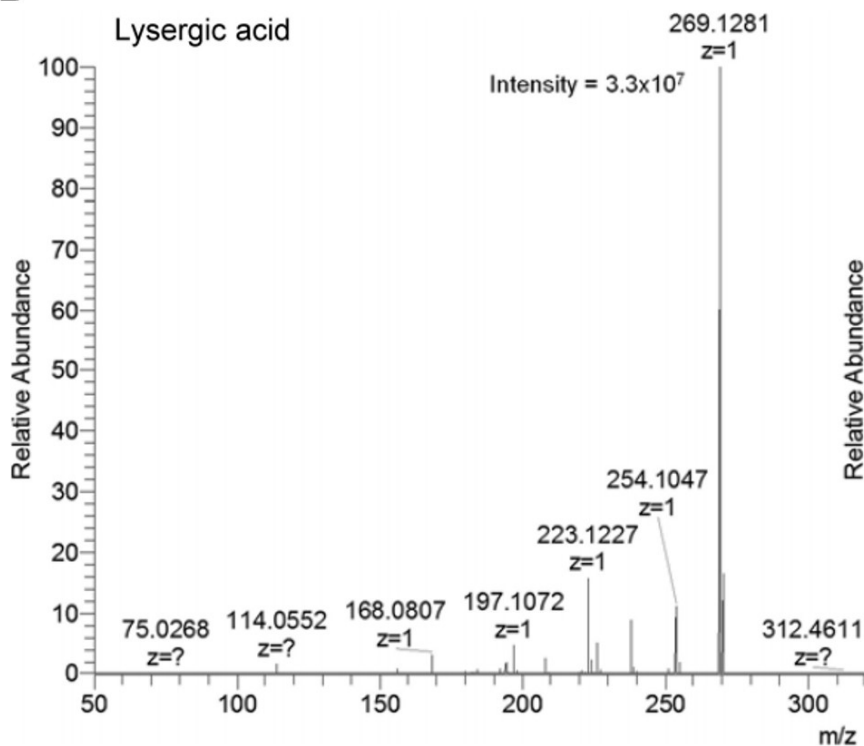

**Figure S4** The results of fermentation mass spectrometry of suspected LA were consistent with those of reported LA mass spectrometry. A. LA mass spectrometry results in this study. B. LA mass spectrometry results in the literature<sup>2</sup>.

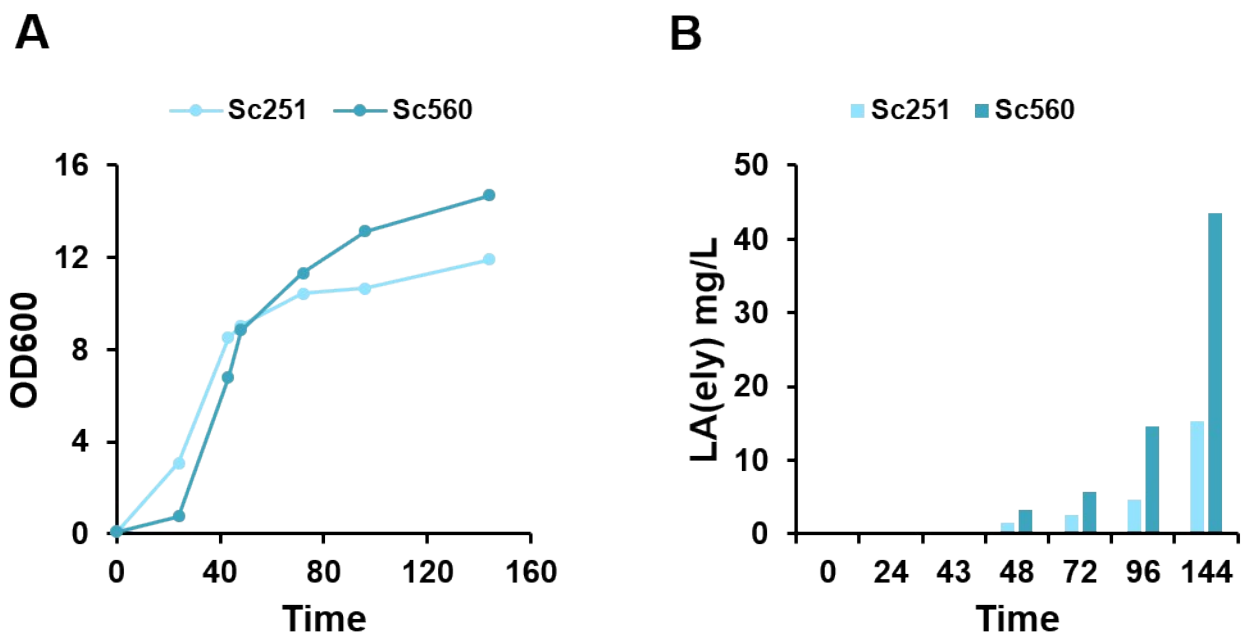

**Figure S5** The results of growth and LA production in control strain(Sc251) and  $\Delta$ sch9 strain(Sc560). A. The OD600 in strains Sc251 and Sc560. B. The titers of LA in strains Sc251 and Sc560.

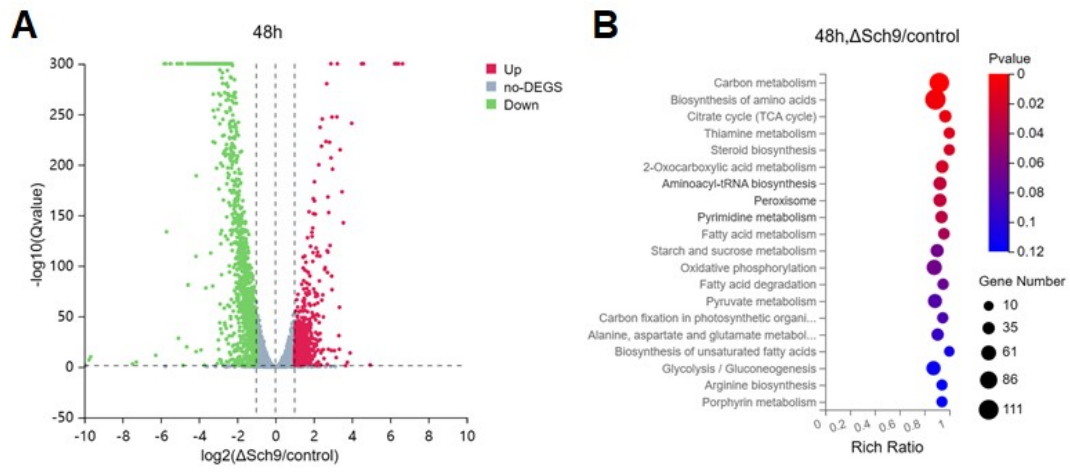

**Figure S6 The effect of  $\Delta sch9$  on LA production.** A. Volcano map of differential genes at 48h between  $\Delta sch9$  and control strains. B. KEGG pathway enrichment analysis of DEGs at 48h between  $\Delta sch9$  and control strains.

### Confidently predicted domains, repeats, motifs and features:

| Name                 | Start ▲ | End | E-value |
|----------------------|---------|-----|---------|
| transmembrane region | 9       | 31  | N/A     |

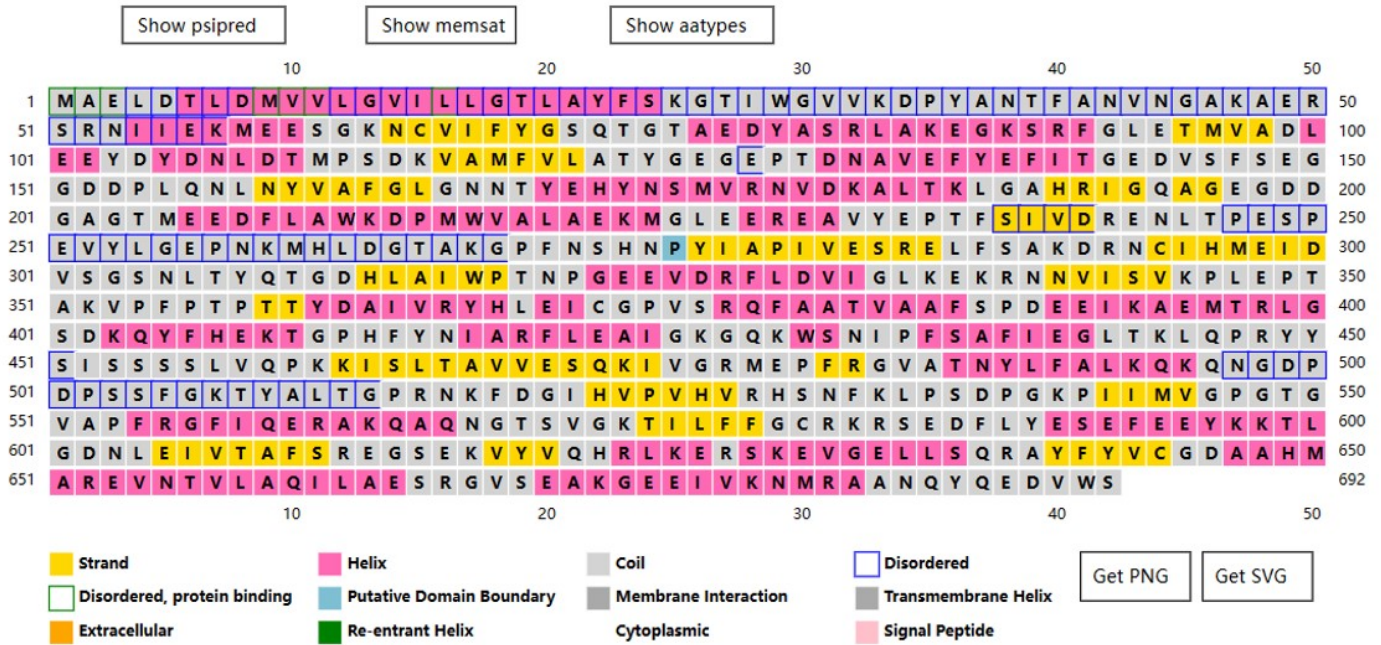

Figure S7 Results of CpCPR transmembrane domain analysis.



## References

1. N. Wu, M. Yao, W. Xiao, T. Dong, H. Ma, X. Du, Y. Wang and Y. Yuan, *ACS Synth Biol*, 2023, **12**, 1133-1145.
2. D. Smith, L. Smith, W. Shafer, J. Klotz and J. Strickland, *J Agric Food Chem*, 2009, **57**, 7213-7220.
